# Supplementary material
Source: PubMed Central journal article supplement (PMC2783775)

## Supplemental Information

### **SOX2 is an Amplified Lineage Survival Oncogene in Lung and Esophageal Squamous Cell Carcinomas**

Adam J. Bass, Hideo Watanabe, Craig H. Mermel, Soyoung Yu, Sven Perner, Roel G. Verhaak, So Young Kim, Leslie Wardwell, Pablo Tamayo, Irit Gat-Viks, Alex H. Ramos, Michele S. Woo, Barbara A. Weir, Gad Getz, Rameen Beroukhim, Michael O'Kelly, Amit Dutt, Orit Rozenblatt-Rosen, Piotr Dziunycz, Justin Komisarof, Lucian R. Chirieac, Christopher J. LaFargue, Veit Scheble, Theresia Wilbertz, Changqing Ma, Shilpa Rao, Hiroshi Nakagawa, Douglas B. Stairs, Lin Lin, Thomas J. Giordano, Patrick Wagner, John D. Minna, Adi F. Gazdar, Chang Qi Zhu, Marcia S. Brose, Ivan Cecconello, Ulysses Ribeiro Jr., Suely K. Marie, Olav Dahl, Ramesh A. Shivdasani, Ming-Sound Tsao, Mark A. Rubin, Kwok K. Wong, Aviv Regev, William C. Hahn, David G. Beer, Anil K. Rustgi, Matthew Meyerson

#### **Supplemental Note: Added details for RNAi experiments**

After the RNAi screen described in the text of the manuscript was performed, we further evaluated the suppression of *DCUN1D1* in our screen, an effect that ranked 7<sup>th</sup> in essentiality of the 13 genes tested. We evaluated the knockdown efficacy of the 10 shRNA constructs targeting *DCUN1D1* and found that eight of these 10 shRNAs suppress *DCUN1D1* protein expression (Supplemental Figure 3). These eight *DCUN1D1*-directed shRNAs show consistently less inhibition of proliferation in 3q26.33-amplified SCC cells than do the five (of six constructs screened) effective shRNA constructs targeting *SOX2* (Supplemental Figure 3). While these findings do not formally exclude the possibility of a role for *DCUN1D1* in SCC pathogenesis, they do not support the identification of *DCUN1D1* as a critical functional target of amplification in SCC.

With the later RNAi experiments using the stably infected and selected cells with shRNA constructs targeting *SOX2* or control GFP we observed both reduced proliferation and reduction in apparent anchorage-independent growth. We noted that the reduction in

proliferation may contribute to this decreased anchorage-independent growth. To try to separate these phenotypes we performed parallel testing of NCI-H520 cells with *SOX2* RNAi with soft-agar and focus formation assays. The results were consistent with an effect of *SOX2* knockdown on anchorage-independent growth exceeding the effect on proliferation (Supplemental Figure 3). In addition, we also sought to evaluate if *SOX2* may be essential for cell lines with *SOX2* expression but not higher-level amplification as seen in the four 3q26.33-amplified cell lines used in the prior experiments. We found *SOX2*-targeting shRNA suppressed anchorage-independent growth in the Sox2-expressing esophageal SCC cell line TE11 that harbors 3q gain (Supplemental Figure 3), suggesting that *SOX2* is also essential for some tumors with lower-level genomic alteration at 3q26.33.

**Supplemental Table 1:  
GISTIC-determined peaks of amplification and deletion in lung and esophageal  
SCC**

**Lung SCC Amplification GISTIC Peaks**

| Cytoband | q value  | Boundaries          | SNP Boundaries       | Genes<br>in<br>Peak | Candidates            |
|----------|----------|---------------------|----------------------|---------------------|-----------------------|
| 3q26.33  | 1.53E-17 | 182472326-184234104 | rs7653021-rs4859266  | 4                   | <i>SOX2</i>           |
| 8p12     | 8.19E-09 | 38252951-39417992   | rs1488935-rs6415692  | 10                  | <i>FGFR1, WHSC1L1</i> |
| 7p11.2   | 9.21E-05 | 54502271-55933841   | rs10254916-rs2331096 | 6                   | <i>EGFR</i>           |

**Lung SCC Deletion GISTIC Peaks**

| Cytoband | q value  | Boundaries        | SNP Boundaries        | Genes<br>in<br>Peak | Candidates      |
|----------|----------|-------------------|-----------------------|---------------------|-----------------|
| 9p21.3   | 2.74E-11 | 21944954-22057275 | rs10757261-rs10965224 | 2                   | <i>CDKN2A/B</i> |

**Esophageal SCC Amplification GISTIC Peaks**

| Cytoband | q value  | Boundaries          | SNP Boundaries       | Genes<br>in<br>Peak | Candidates                     |
|----------|----------|---------------------|----------------------|---------------------|--------------------------------|
| 11q13.2  | 2.00E-43 | 68807653-69942337   | rs3924679-rs12808511 | 10                  | <i>CCND1</i>                   |
| 7p11.2   | 3.11E-06 | 54604765-55363608   | rs4425711-rs6976824  | 2                   | <i>EGFR</i>                    |
| 3q26.33  | 7.39E-05 | 182706356-183933466 | rs4855031-rs2700847  | 1                   | <i>SOX2</i>                    |
| 8q24.21  | 0.003    | 128351094-128699323 | rs1011387-rs4562277  | 2                   | <i>POU5F1B, MYC</i>            |
| 8p12     | 0.003    | 38229373-38755603   | rs2898674-rs55669404 | 6                   | <i>FGFR1, WHSC1L1, PPADC1B</i> |

**Esophageal SCC Deletion GISTIC Peaks**

| Cytoband | q value  | Boundaries          | SNP Boundaries        | Genes<br>in<br>Peak | Candidates      |
|----------|----------|---------------------|-----------------------|---------------------|-----------------|
| 9p21.3   | 1.48E-52 | 21944954-22031997   | rs10757261-rs17694493 | 2                   | <i>CDKN2A/B</i> |
| Xp22.33  | 2.18E-10 | 2618641-2687133     | rs1700955-rs66657603  | 2                   |                 |
| 2q22.1   | 3.81E-06 | 141373426-141738261 | rs12691581-rs10928100 | 1                   | <i>LRP1B</i>    |
| 18q22.1  | 6.16E-05 | 61759478-69251643   | rs2587428-rs1943817   | 10                  |                 |
| 3p14.2   | 0.0001   | 60352583-60385066   | rs736934-rs2594252    | 1                   | <i>FHIT</i>     |
| 2q22.1   | 0.0004   | 142020039-142191813 | rs7574682-rs10199508  | 1                   | <i>LRP1B</i>    |

## Supplemental Table 2: Samples and Reagents

### Samples Used for SNP Array Studies

| Sample | Grade    | Stage | Site           | Type    | SOX2 CN |
|--------|----------|-------|----------------|---------|---------|
| 1330   | mod      | IA    | Lung SCC       | Primary | 2.32    |
| 1353   | poor     | IIB   | Lung SCC       | Primary | 2.15    |
| 1669   | mod      | IIB   | Lung SCC       | Primary | 2.04    |
| 1673   | mod      | IB    | Lung SCC       | Primary | 1.99    |
| 1707   | poor     | IB    | Lung SCC       | Primary | 3.49    |
| 1816   | mod      | IIA   | Lung SCC       | Primary | 2.03    |
| 2032   | poor     | IB    | Lung SCC       | Primary | 4.69    |
| 2132   | poor     | IIB   | Lung SCC       | Primary | 3.46    |
| 2225   | poor     | IIIA  | Lung SCC       | Primary | 2.22    |
| 2345   | mod      | IIB   | Lung SCC       | Primary | 2.45    |
| 2523   | mod      | IIB   | Lung SCC       | Primary | 2.05    |
| 2536   | poor     | IB    | Lung SCC       | Primary | 2.93    |
| 2631   | mod      | IIB   | Lung SCC       | Primary | 4.38    |
| 2727   | mod/poor | IIB   | Lung SCC       | Primary | 3.1     |
| 2808   | mod/poor | IIB   | Lung SCC       | Primary | 2.38    |
| 3076   | poor     | IA    | Lung SCC       | Primary | 2.47    |
| 3121   | mod/well | IIIB  | Lung SCC       | Primary | 6.73    |
| 3253   | poor     | IB    | Lung SCC       | Primary | 6.78    |
| 3289   | mod      | IB    | Lung SCC       | Primary | 1.98    |
| 3312   | mod      | IA    | Lung SCC       | Primary | 2.19    |
| 12T    | mod      | IB    | Lung SCC       | Primary | 2.05    |
| 13T    | mod/poor | IB    | Lung SCC       | Primary | 3.71    |
| 15T    | mod      | IIB   | Lung SCC       | Primary | 5.28    |
| 1735P  | poor     | III   | Esophageal SCC | Primary | 1.97    |
| 1737P  | mod      | IVa   | Esophageal SCC | Primary | 2.32    |
| 1739P  | poor     | III   | Esophageal SCC | Primary | 2.62    |
| 1747P  | poor     | III   | Esophageal SCC | Primary | 1.94    |
| 1749P  | mod      | IVa   | Esophageal SCC | Primary | 2.53    |
| 1759P  | well     | III   | Esophageal SCC | Primary | 2.65    |
| 1761P  | well     | III   | Esophageal SCC | Primary | 2.07    |
| 1777P  | mod      | III   | Esophageal SCC | Primary | 2.4     |
| 17T    | mod      | IIA   | Lung SCC       | Primary | 2.81    |
| 1813P  | mod      | II    | Esophageal SCC | Primary | 2.65    |
| 1817P  | mod      | II    | Esophageal SCC | Primary | 2.35    |
| 1819P  | poor     | II    | Esophageal SCC | Primary | 2.63    |
| 19T    | mod      | IB    | Lung SCC       | Primary | 2.24    |
| 21T    | mod      | IB    | Lung SCC       | Primary | 2.33    |
| 23T    | mod      | IIB   | Lung SCC       | Primary | 3.1     |
| 24T    | mod      | IIB   | Lung SCC       | Primary | 2.09    |
| 2T     | well     | IB    | Lung SCC       | Primary | 2.76    |
| 30T    | mod      | IB    | Lung SCC       | Primary | 2.14    |
| 32T    | mod      | IIB   | Lung SCC       | Primary | 2.93    |
| 33T    | poor     | IIB   | Lung SCC       | Primary | 2.01    |
| 38T    | mod      | IB    | Lung SCC       | Primary | 3.14    |
| 3T     | mod      | IB    | Lung SCC       | Primary | 3.05    |
| 40T    | mod      | IIB   | Lung SCC       | Primary | 3.99    |
| 43T    | mod      | IIB   | Lung SCC       | Primary | 4.06    |

|      |       |     |                |           |       |
|------|-------|-----|----------------|-----------|-------|
| 47T  | mod   | IB  | Lung SCC       | Primary   | 2     |
| 51T  | poor  | IIA | Lung SCC       | Primary   | 4.38  |
| 52T  | mod   | IB  | Lung SCC       | Primary   | 3.69  |
| 54T  | mod   | IB  | Lung SCC       | Primary   | 2.23  |
| 57T  | mod   | IIB | Lung SCC       | Primary   | 2.34  |
| 59T  | poor  | IB  | Lung SCC       | Primary   | 2.81  |
| 60T  | poor  | IB  | Lung SCC       | Primary   | 4.84  |
| 69T  | mod   | IIB | Lung SCC       | Primary   | 3.43  |
| 71T  | mod   | IB  | Lung SCC       | Primary   | 2.98  |
| 72T  | poor  | IIA | Lung SCC       | Primary   | 2.36  |
| 8T   | poor  | IIA | Lung SCC       | Primary   | 2.28  |
| HCE7 | N/A   | N/A | Esophageal SCC | Cell Line | 4.28  |
| KW1  | mod   | III | Esophageal SCC | Primary   | 2     |
| KW10 | poor  | III | Esophageal SCC | Primary   | 2.87  |
| KW11 | mod   | I   | Esophageal SCC | Primary   | 2.39  |
| KW12 | poor  | III | Esophageal SCC | Primary   | 2.76  |
| KW13 | well  | IV  | Esophageal SCC | Primary   | 2.99  |
| KW14 | poor  | III | Esophageal SCC | Primary   | 3.2   |
| KW15 | mod   | III | Esophageal SCC | Primary   | 2.66  |
| KW16 | mod   | IIA | Esophageal SCC | Primary   | 2.39  |
| KW17 | poor  | IIB | Esophageal SCC | Primary   | 2.76  |
| KW18 | other | III | Esophageal SCC | Primary   | 3.3   |
| KW2  | mod   | IV  | Esophageal SCC | Primary   | 6.11  |
| KW3  | mod   | IIB | Esophageal SCC | Primary   | 2.84  |
| KW4  | mod   | IV  | Esophageal SCC | Primary   | 2.29  |
| KW5  | Poor  | IV  | Esophageal SCC | Primary   | 1.91  |
| KW6  | mod   | I   | Esophageal SCC | Primary   | 2.65  |
| KW7  | mod   | III | Esophageal SCC | Primary   | 2.69  |
| KW8  | mod   | III | Esophageal SCC | Primary   | 2.11  |
| KW9  | mod   | III | Esophageal SCC | Primary   | 2.33  |
| TE1  | well  | II  | Esophageal SCC | Cell Line | 2.26  |
| TE10 | well  | IV  | Esophageal SCC | Cell Line | 7.02  |
| TE11 | mod   | IV  | Esophageal SCC | Cell Line | 2.54  |
| TE15 | well  | IV  | Esophageal SCC | Cell Line | 2.35  |
| TE4  | well  | III | Esophageal SCC | Cell Line | 3.91  |
| TE5  | poor  | IV  | Esophageal SCC | Cell Line | 3.42  |
| TE6  | well  | IV  | Esophageal SCC | Cell Line | 10.59 |
| TE8  | mod   | III | Esophageal SCC | Cell Line | 3.26  |
| TE9  | poor  | IV  | Esophageal SCC | Cell Line | 2.38  |
| TT   | N/A   | IV  | Esophageal SCC | Cell Line | 3.61  |

#### shRNA Vectors Used in RNAi Screen

| Gene Symbol   | TRC clone name       |
|---------------|----------------------|
| <i>ATP11B</i> | XM_087254.4-2579s1c1 |
| <i>ATP11B</i> | XM_087254.4-1435s1c1 |
| <i>ATP11B</i> | XM_087254.4-2284s1c1 |
| <i>ATP11B</i> | XM_087254.4-526s1c1  |
| <i>ATP11B</i> | XM_087254.4-1555s1c1 |
| <i>ATP11B</i> | NM_029570.3-1969s1c1 |
| <i>ATP11B</i> | NM_029570.3-341s1c1  |
| <i>B3GNT5</i> | NM_032047.3-1286s1c1 |
| <i>B3GNT5</i> | NM_032047.3-728s1c1  |
| <i>B3GNT5</i> | NM_032047.3-1511s1c1 |

|                |                      |
|----------------|----------------------|
| <i>B3GNT5</i>  | NM_032047.3-736slc1  |
| <i>B3GNT5</i>  | NM_032047.3-1220slc1 |
| <i>DCUNID1</i> | NM_020640.2-467slc1  |
| <i>DCUNID1</i> | NM_020640.2-397slc1  |
| <i>DCUNID1</i> | NM_020640.2-235slc1  |
| <i>DCUNID1</i> | NM_020640.2-588slc1  |
| <i>DCUNID1</i> | NM_020640.2-757slc1  |
| <i>DCUNID1</i> | NM_020640.2-1521slc1 |
| <i>DCUNID1</i> | NM_020640.2-355slc1  |
| <i>DCUNID1</i> | NM_020640.2-2035slc1 |
| <i>DCUNID1</i> | NM_020640.2-1285slc1 |
| <i>DCUNID1</i> | NM_033623.2-111slc1  |
| <i>DNAJC19</i> | NM_201260.1-730slc1  |
| <i>DNAJC19</i> | NM_201260.1-799slc1  |
| <i>DNAJC19</i> | NM_201260.1-616slc1  |
| <i>DNAJC19</i> | NM_201260.1-187slc1  |
| <i>DNAJC19</i> | NM_201260.1-907slc1  |
| <i>FXR1</i>    | NM_005087.1-579slc1  |
| <i>FXR1</i>    | NM_005087.1-130slc1  |
| <i>FXR1</i>    | NM_005087.1-1028slc1 |
| <i>KLHL6</i>   | NM_130446.1-1260slc1 |
| <i>KLHL6</i>   | NM_130446.1-547slc1  |
| <i>KLHL6</i>   | NM_130446.1-4632slc1 |
| <i>KLHL6</i>   | NM_130446.1-709slc1  |
| <i>KLHL6</i>   | NM_130446.1-2535slc1 |
| <i>LAMP3</i>   | NM_014398.2-1041slc1 |
| <i>LAMP3</i>   | NM_014398.2-304slc1  |
| <i>LAMP3</i>   | NM_014398.2-842slc1  |
| <i>LAMP3</i>   | NM_014398.2-1810slc1 |
| <i>LAMP3</i>   | NM_014398.2-388slc1  |
| <i>MCCC1</i>   | NM_020166.2-1958slc1 |
| <i>MCCC1</i>   | NM_020166.2-1957slc1 |
| <i>MCCC1</i>   | NM_020166.2-859slc1  |
| <i>MCF2L2</i>  | NM_015078.2-466slc1  |
| <i>MCF2L2</i>  | NM_015078.2-1248slc1 |
| <i>MCF2L2</i>  | NM_015078.2-2760slc1 |
| <i>MCF2L2</i>  | NM_015078.2-316slc1  |
| <i>MCF2L2</i>  | NM_015078.2-2121slc1 |
| <i>PIK3CA</i>  | NM_006218.2-1900slc1 |
| <i>PIK3CA</i>  | NM_006218.2-3471slc1 |
| <i>PIK3CA</i>  | NM_006218.2-2892slc1 |
| <i>SOX2</i>    | NM_003106.x-787slc1  |
| <i>SOX2</i>    | NM_003106.x-2378slc1 |
| <i>SOX2</i>    | NM_003106.x-1060slc1 |
| <i>SOX2</i>    | NM_011443.2-1665slc1 |
| <i>SOX2</i>    | NM_011443.2-1027slc1 |
| <i>SOX2</i>    | NM_011443.2-850slc1  |
| <i>TP63</i>    | NM_003722.3-2716slc1 |
| <i>TP63</i>    | NM_003722.3-870slc1  |
| <i>TP63</i>    | NM_003722.3-2058slc1 |
| <i>TP63</i>    | NM_003722.3-164slc1  |
| <i>TP63</i>    | NM_003722.3-1218slc1 |
| <i>TTC14</i>   | NM_133462.1-1838slc1 |
| <i>TTC14</i>   | NM_133462.1-2468slc1 |

|              |                      |
|--------------|----------------------|
| <i>TTC14</i> | NM_133462.1-393s1c1  |
| <i>TTC14</i> | NM_133462.1-2482s1c1 |
| <i>TTC14</i> | NM_133462.1-2278s1c1 |

**shRNA Vectors Used for Follow-up Experiments**

| <b>shRNA</b> | <b>TRC Clone ID</b>  | <b>target</b>         |
|--------------|----------------------|-----------------------|
| shSOX2a      | NM_011443.2-1665s1c1 | CGAGATAAACATGGCAATCAA |
| shSOX2b      | NM_003106.x-2378s1c1 | CTGCCGAGAATCCATGTATAT |
| shGFP        |                      | ACAACAGCCACAACGTCTATA |

**Primers Used for Real-Time PCR**

| <b>Gene</b>  | <b>Primer 1</b>         | <b>Primer 2</b>           |
|--------------|-------------------------|---------------------------|
| <i>GAPDH</i> | CATGAGAAGTATGACAACAGCCT | AGTCCTTCCACGATACCAAAGT    |
| <i>KRT6A</i> | GGCTGAGGAGCGTGAACAG     | CCAGGAACCGCACCTTGT        |
| <i>TP63</i>  | CCTTACTTTGCTGAGGGTTTGAA | CAAGGCCCTAGTGTTACCTGAATAG |
| <i>SOX2</i>  | TACAGCATGTCCTACTCGCAG   | GAGGAAGAGGTAACCACAGGG     |

**Supplemental Table 3:**  
**Genes correlated with *SOX2* expression in lung squamous cell carcinoma**

| <u>Rank</u> | <u>Gene Name</u> | <u>Score</u> |
|-------------|------------------|--------------|
| 1           | <i>SOX2</i>      | 31.7851      |
| 2           | <i>FOXE1</i>     | 11.3745      |
| 3           | <i>CHST7</i>     | 8.5647       |
| 4           | <i>ARTN</i>      | 8.3056       |
| 5           | <i>PRKY</i>      | 8.109        |
| 6           | <i>GPX2</i>      | 7.593        |
| 7           | <i>CSRP2</i>     | 7.5534       |
| 8           | <i>SUSD4</i>     | 7.4062       |
| 9           | <i>BLMH</i>      | 7.2036       |
| 10          | <i>ADH7</i>      | 7.1618       |
| 11          | <i>FGFR2</i>     | 6.9599       |
| 12          | <i>RAB40B</i>    | 6.6939       |
| 13          | <i>KLF5</i>      | 6.6201       |
| 14          | <i>ADAM23</i>    | 6.6189       |
| 15          | <i>ABCC5</i>     | 6.5715       |
| 16          | <i>RRM1</i>      | 6.5583       |
| 17          | <i>TMPRSS4</i>   | 6.4615       |
| 18          | <i>ATP1B3</i>    | 6.3264       |
| 19          | <i>RMND5A</i>    | 6.2492       |
| 20          | <i>SIAH2</i>     | 6.1775       |
| 21          | <i>PRKY</i>      | 6.1614       |
| 22          | <i>DHX9</i>      | 6.1583       |
| 23          | <i>RAB6B</i>     | 6.067        |
| 24          | <i>PSMD11</i>    | 5.9397       |
| 25          | <i>MSH6</i>      | 5.8637       |
| 26          | <i>CST1</i>      | 5.8374       |
| 27          | <i>CNTN1</i>     | 5.7848       |
| 28          | <i>GDAP1</i>     | 5.7771       |
| 29          | <i>BMP7</i>      | 5.7262       |
| 30          | <i>CHAC1</i>     | 5.7015       |
| 31          | <i>PLA2G4B</i>   | 5.6961       |
| 32          | <i>BDH1</i>      | 5.6752       |
| 33          | <i>AKR1C3</i>    | 5.606        |
| 34          | <i>TBLIX</i>     | 5.5977       |
| 35          | <i>MARK1</i>     | 5.5919       |
| 36          | <i>ABCC1</i>     | 5.5832       |
| 37          | <i>LRP8</i>      | 5.5674       |
| 38          | <i>TP63</i>      | 5.5629       |
| 39          | <i>ENTPD3</i>    | 5.4769       |
| 40          | <i>DST</i>       | 5.472        |
| 41          | <i>AKR1C4</i>    | 5.4702       |
| 42          | <i>GPC3</i>      | 5.4598       |
| 43          | <i>LSG1</i>      | 5.4367       |
| 44          | <i>C3orf58</i>   | 5.4189       |
| 45          | <i>NEO1</i>      | 5.4185       |
| 46          | <i>KRT6A</i>     | 5.3818       |
| 47          | <i>CYB5R2</i>    | 5.3704       |
| 48          | <i>FOXRED2</i>   | 5.3328       |
| 49          | <i>UGT1A9</i>    | 5.322        |
| 50          | <i>USP39</i>     | 5.2764       |

Expression profiling data from 92 stage I/II tumors were analyzed to identify the 10 tumors with highest and lowest *SOX2* expression. The top 50 genes whose expression distinguishes these two groups are listed in descending rank order.



## Supplemental Figure Legends

**Supplemental Figure 1: Additional Data from SNP Array Analysis** A) Plots of GISTIC scores for recurrent high-level deletions in 47 primary SCCs of the lung (left) and 40 esophageal SCC samples (29 primary samples and 11 cell lines; right). X-axis shows the G-score (top) and false discovery rate (q-value; bottom) for recurrent deletions with a green line demarcating FDR cut-off of 0.005. Labels on right denote the position of the peak of the significantly altered region. B) Copy number at 3q26-28 loci in samples with highest copy numbers in each of *SOX2*, *PIK3CA* or *TP63*. Copy number is depicted across a region of 3q spanning 180-192 Mb. The copy number is charted as log<sub>2</sub> CN ratio of the tumor to normal (see color bar). Positions of *SOX2*, *PIK3CA*, *TP63* and *SOX2*'s immediate neighboring genes *DNAJC19* and (*ATP11B/DCUN1D1*) are marked. The 18 samples comprising the group of samples with the ten highest copy numbers at the *SOX2*, *TP63* or *PIK3CA* loci are shown and are depicted in decreasing order of copy number at *SOX2*.

**Supplemental Figure 2: Correlations of *SOX2* Amplifications and Expression** A) SNP array determined copy-number at *SOX2* and *SOX2* mRNA expression are plotted for 27 lung SCC samples. B) Comparison of *SOX2* mRNA expression in those samples meeting or not-meeting the threshold for amplification via SNP arrays (3.6 inferred copies) showing significant increase in amplified cases. C) Measurement of Sox2 protein via immunohistochemistry in tissue microarray normal esophagus, and esophageal SCC cases. Cores representing samples of normal esophagus and cases with low and high Sox2 expression are shown. The chart shows Sox2 immunohistochemistry

staining in cases with *SOX2* amplification (>10 copies per FISH) compared to those with inferred diploid copy at *SOX2*.

**Supplemental Figure 3: Additional Data from RNAi Experiments** A) Immunoblots demonstrate knockdown efficiency of each of the 10 shRNA constructs against *DCUN1D1* compared to control (shGFP) in HCC95 lung SCC cells. B) Graphed are the effects of the eight effective *DCUN1D1* shRNA constructs and five *SOX2* constructs with effective knockdown in the RNAi screen. For each cell line, the impact on viability of each shRNA construct relative to control (shGFP and shLacZ) is plotted horizontally with shRNA constructs ranked by efficacy. Lower ratios are indicative of reduced viability. C) Comparative effects of shSOX2b on foci formation and anchorage-independent growth in NCI-H520 cells. The numbers of soft-agar colonies and foci formed for the shSOX2b relative to shGFP are plotted (+/- standard deviation) with p-values labeled with asterisks as in Figure 2 in the main text. D) Immunoblots showing expression of Sox2 and Vinculin in TE11 cells relative to NIH-H520, HCC95 and NCI-H1437. The chart shows anchorage-independent growth of TE11 expressing shRNAs targeting *SOX2* or *GFP* (+/- standard deviation) with p-values labeled with asterisks as in Figure 2.

**Supplemental Figure 4: Amplification and Expression of *SOX2* and *NKX2-1* Differ Between SCCs and Adenocarcinoma of the Lung.** A) Segmented copy number on chromosome 3q with position of *SOX2* labeled. SCCs of the lung (47) are depicted (columns) in the left box and compared to an equal sized set of lung adenocarcinomas. For equivalent analysis, the adenocarcinoma samples pictured were randomly selected

from a larger sample collection. The color scale ranges from blue (deletion) to white (neutral copy number) to red (amplification). On the right plot, G-scores for amplification along 3q are plotted for the two groups. B) Copy number data on chromosome 14q from 47 samples of lung squamous cell carcinomas and 47 randomly selected lung adenocarcinomas; G-scores for amplifications for the two groups are plotted on the right. The position of *NKX2-1* on 14q is labeled. C-D) Expression of mRNA for *SOX2* and *NKX2-1* in lung SCC (panel C; n=92) and lung adenocarcinoma (panel D; n=353). Box-plots show median expression and 25<sup>th</sup>/75<sup>th</sup> percentiles with outside lines showing limits of 95% of samples. Y-axis is log<sub>2</sub> expression in arbitrary expression units. P-values for significance of differential expression for panels C and D are labeled.

Supplemental Figure 1

A

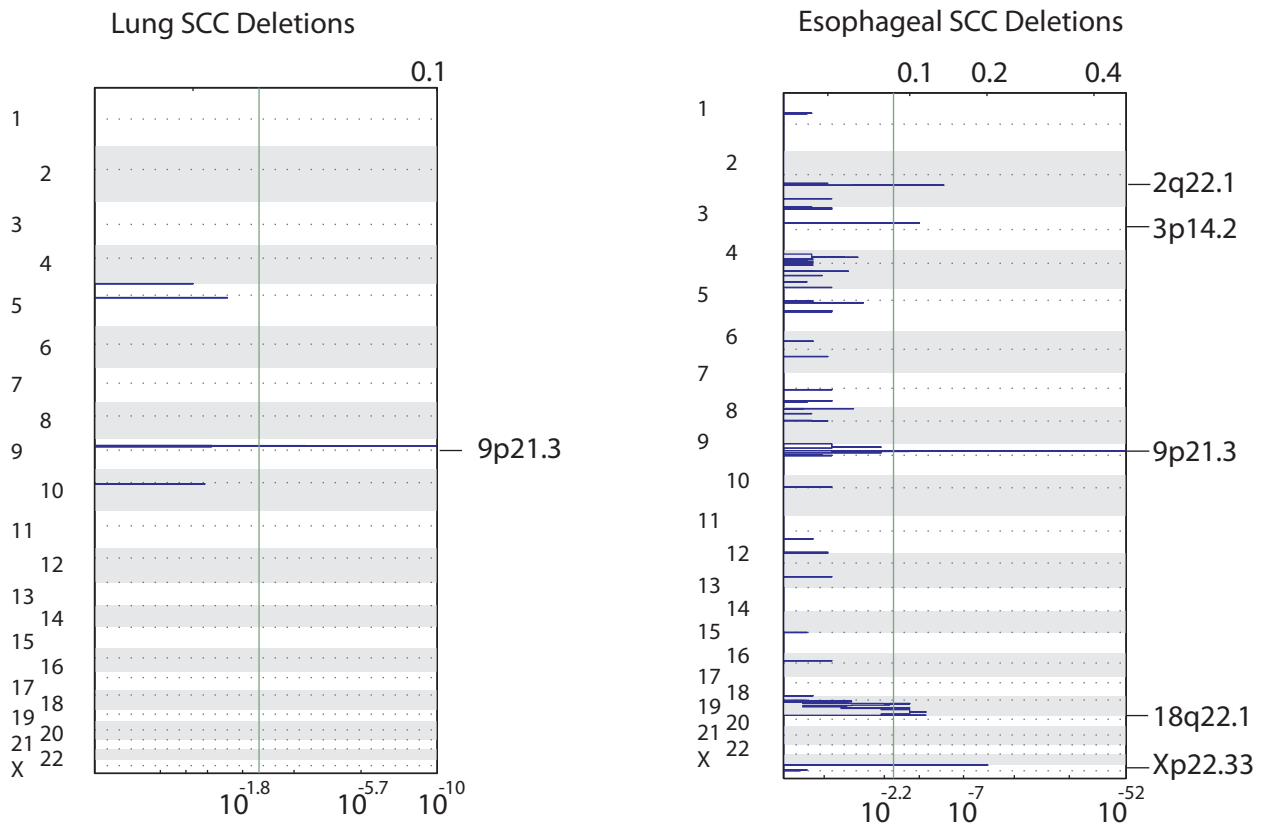

B

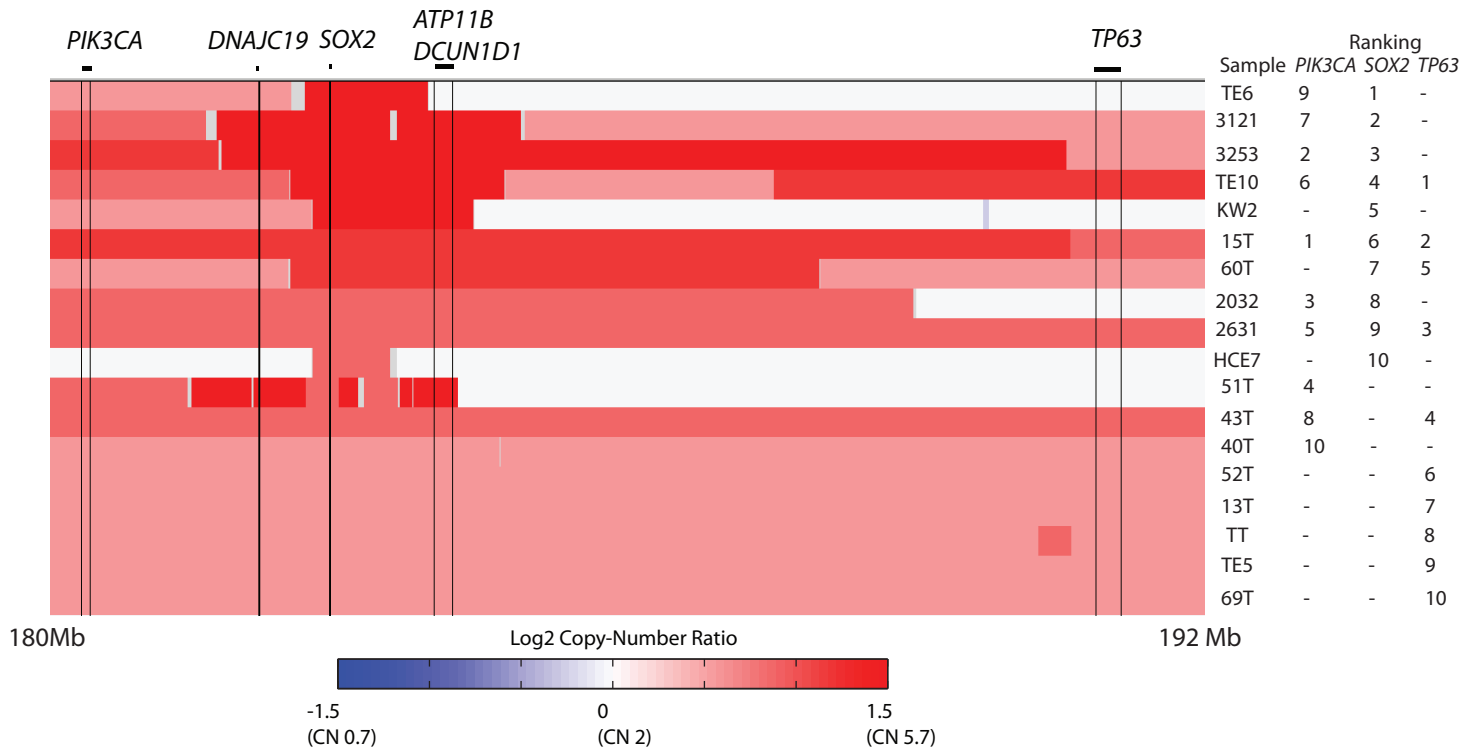

Supplemental Figure 2

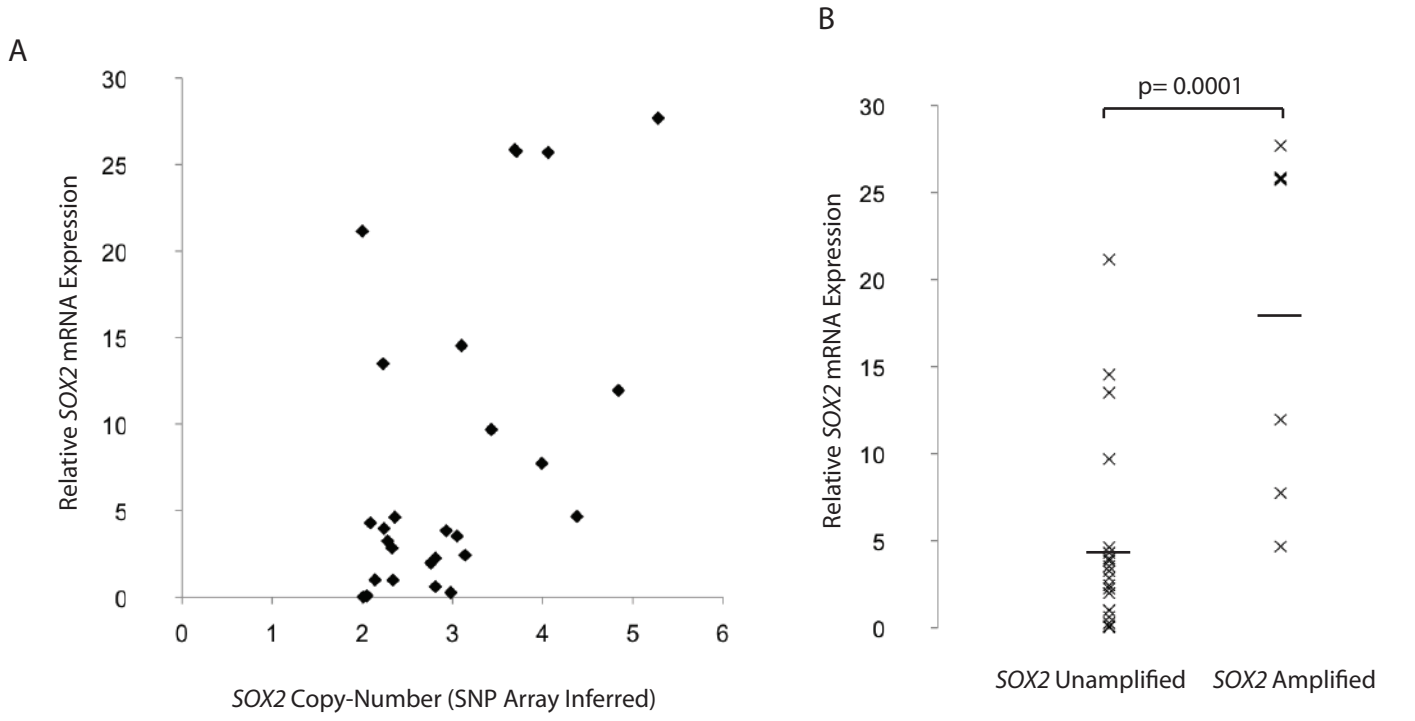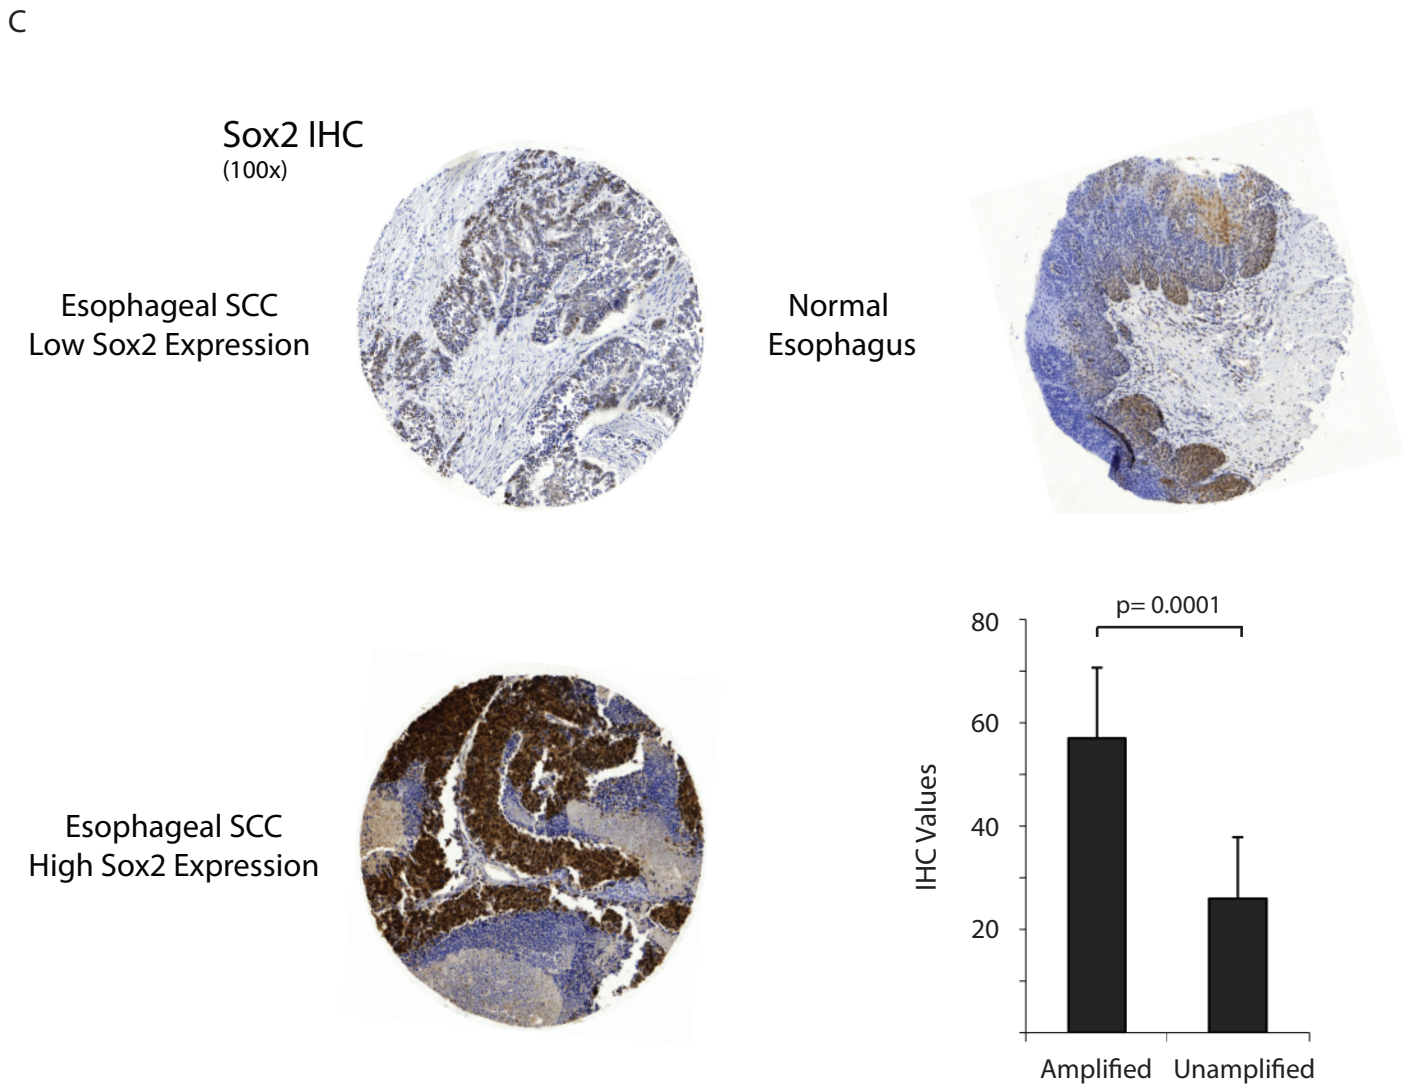

Supplemental Figure 3

A

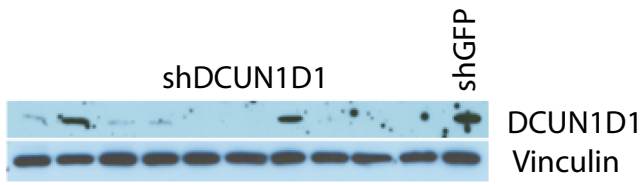

B

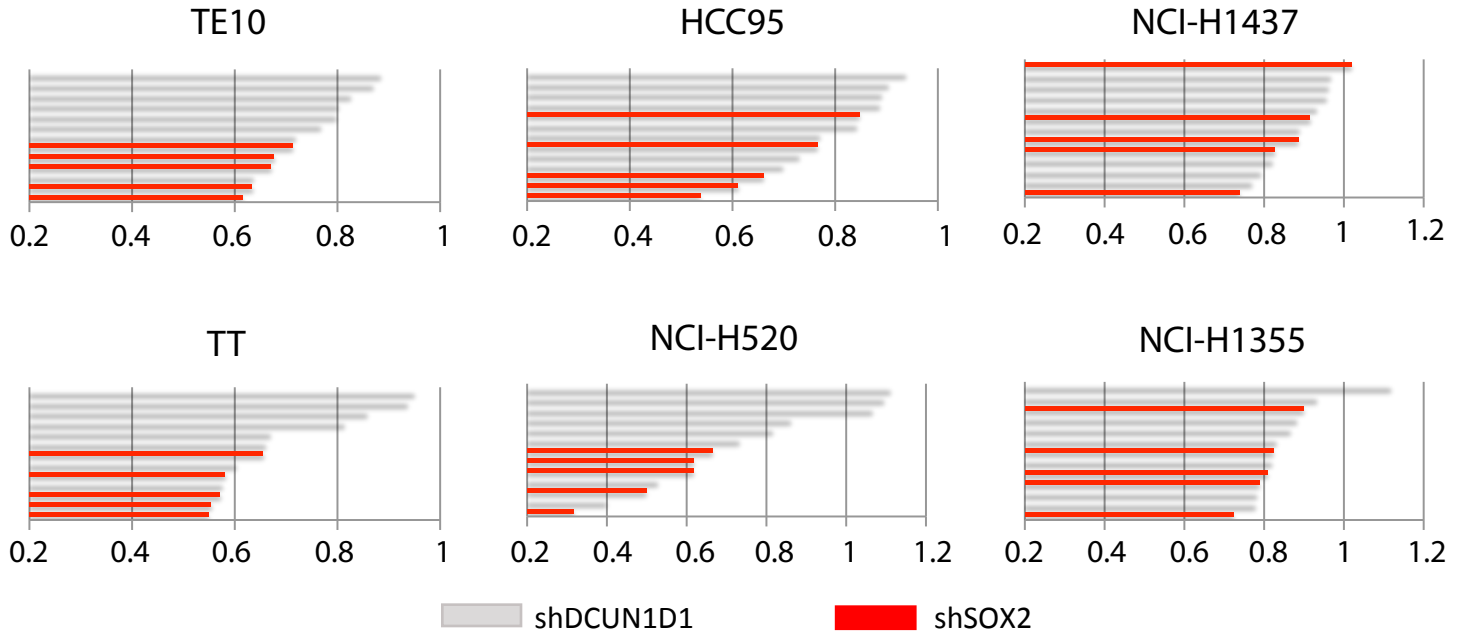

C

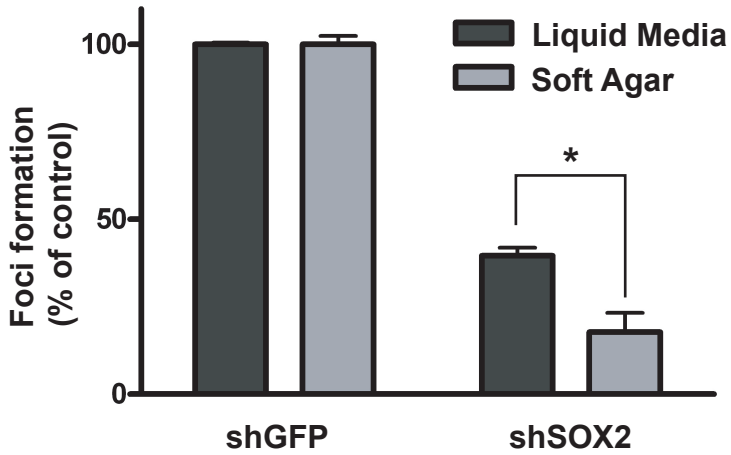

D

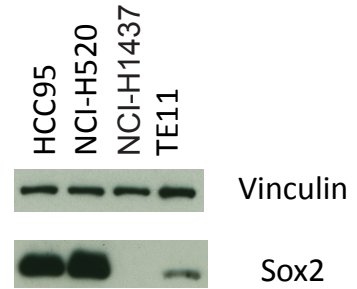

E

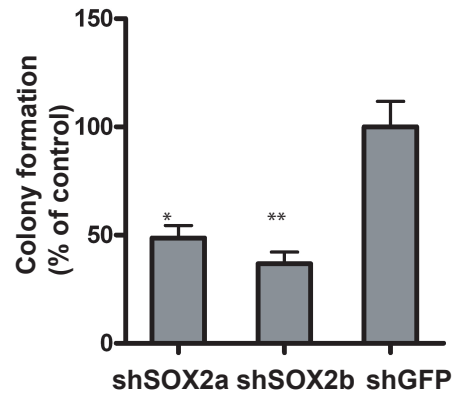

Supplemental Figure 4

**A**

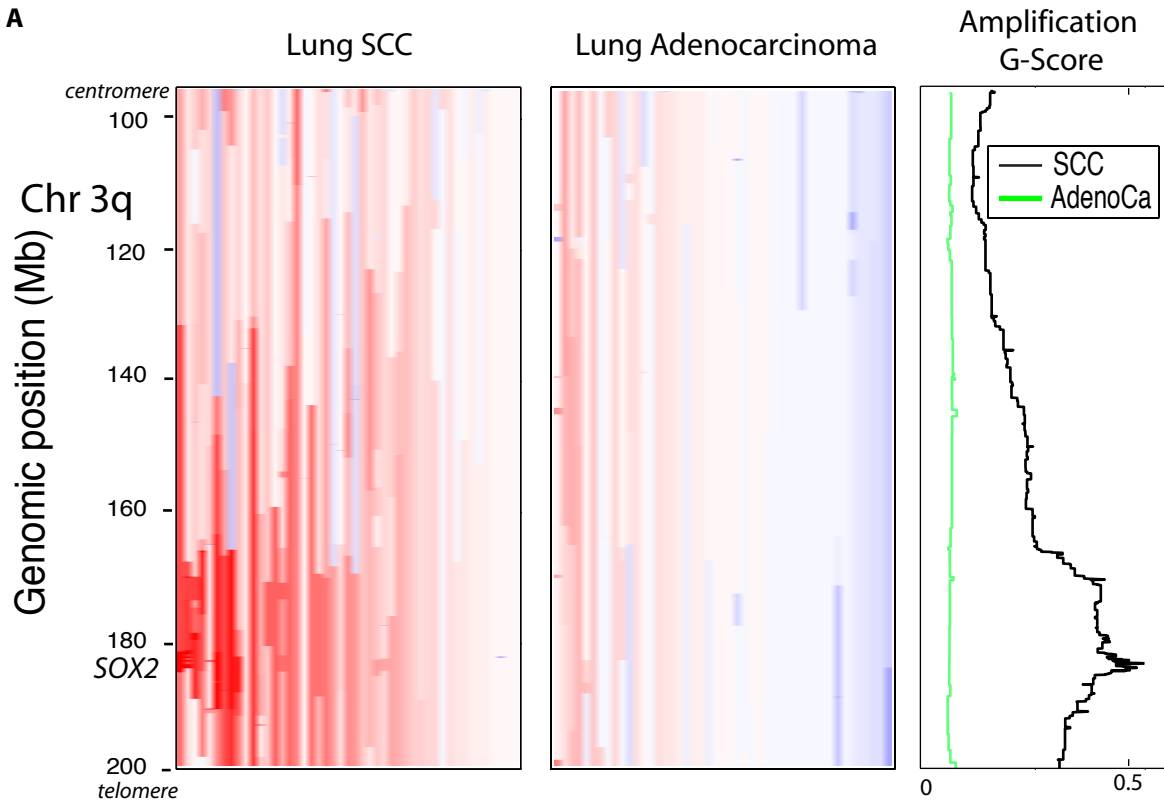

**B**

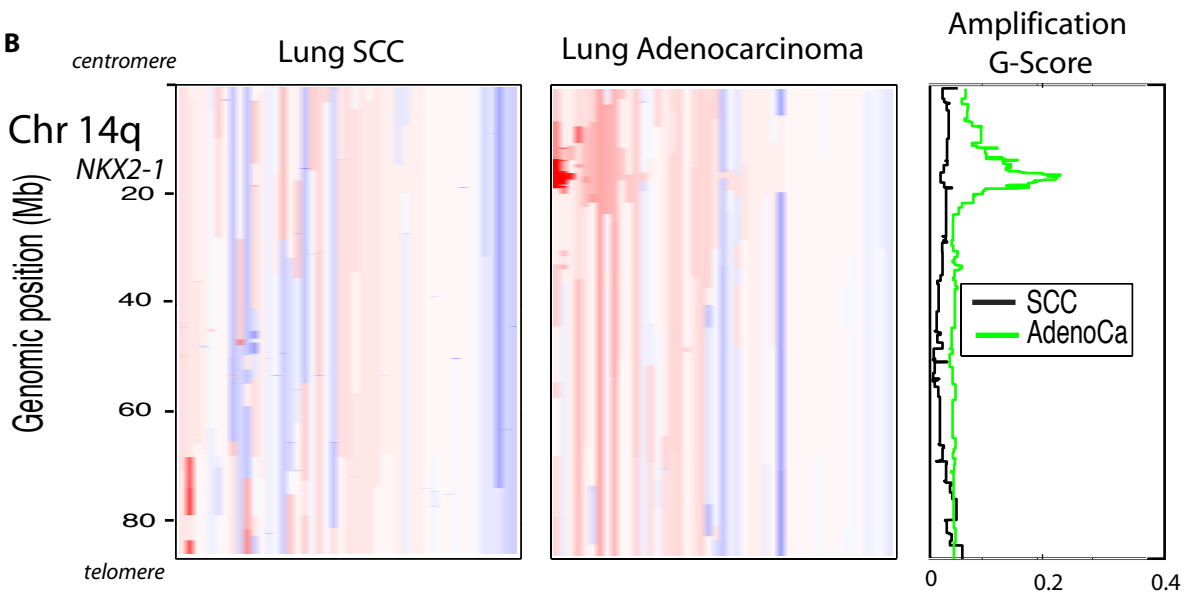

**C**

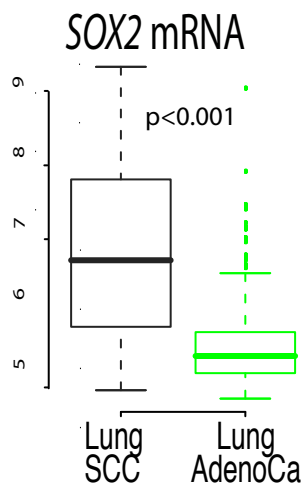

**D**

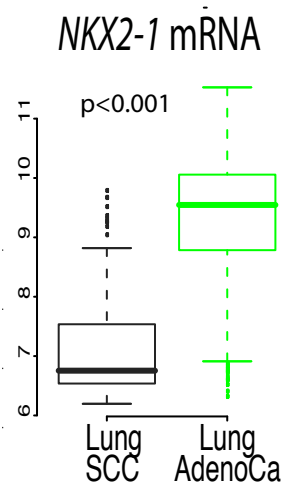

Supplement: NIHMS146116-supplement-1.pdf [file NIHMS146116-supplement-1.pdf]
